# Supplementary material for: Network Properties of Robust Immunity in Plants
Source: PLOS journal article supplement (doi:10.1371/journal.pgen.1000772), 2009-12-10
Supplement: S15 (10.1371/journal.pgen.1000772.s015) [file journal.pgen.1000772.s015]

Table S7

| Comparisons                        | 0dpi    | 2dpi    |
|------------------------------------|---------|---------|
| _Col:dde2                          | 0.86015 | 0.0178  |
| _Col:dde2/ein2                     | 0.46889 | 1E-15   |
| _Col:dde2/ein2/pad4                | 0.72188 | 9.9E-37 |
| _Col:dde2/ein2/pad4/sid2           | 0.52391 | 2.7E-83 |
| _Col:dde2/ein2/sid2                | 0.80964 | 7.3E-34 |
| _Col:dde2/pad4                     | 0.62976 | 4.3E-20 |
| _Col:dde2/pad4/sid2                | 0.99325 | 2.5E-20 |
| _Col:dde2/sid2                     | 0.49052 | 3.5E-18 |
| _Col:ein2                          | 0.74336 | 9.8E-07 |
| _Col:ein2/pad4                     | 0.94324 | 6.9E-31 |
| _Col:ein2/pad4/sid2                | 0.9033  | 6.3E-32 |
| _Col:ein2/sid2                     | 0.81868 | 3.3E-25 |
| _Col:fls2                          | 0.71197 | 2.4E-71 |
| _Col:pad4                          | 0.92441 | 8.5E-07 |
| _Col:pad4/sid2                     | 0.77168 | 5.5E-20 |
| _Col:sid2                          | 0.52549 | 3.2E-11 |
| dde2:dde2/ein2                     | 0.65439 | 1.9E-06 |
| dde2:dde2/ein2/pad4                | 0.88329 | 5.8E-18 |
| dde2:dde2/ein2/pad4/sid2           | 0.78364 | 5.5E-34 |
| dde2:dde2/ein2/sid2                | 0.95786 | 3.1E-16 |
| dde2:dde2/pad4                     | 0.59098 | 1.1E-08 |
| dde2:dde2/pad4/sid2                | 0.88017 | 9E-09   |
| dde2:dde2/sid2                     | 0.67504 | 9.5E-08 |
| dde2:ein2                          | 0.90172 | 0.03617 |
| dde2:ein2/pad4                     | 0.83993 | 9.4E-15 |
| dde2:ein2/pad4/sid2                | 0.96438 | 3.5E-15 |
| dde2:ein2/sid2                     | 0.74063 | 1.4E-11 |
| dde2:fls2                          | 0.65611 | 7.3E-40 |
| dde2:pad4                          | 0.82485 | 0.03412 |
| dde2:pad4/sid2                     | 0.92584 | 1.1E-08 |
| dde2:sid2                          | 0.70792 | 0.00039 |
| dde2/ein2:dde2/ein2/pad4           | 0.76348 | 0.0001  |
| dde2/ein2:dde2/ein2/pad4/sid2      | 0.78428 | 1.4E-10 |
| dde2/ein2:dde2/ein2/sid2           | 0.69296 | 0.00068 |
| dde2/ein2:dde2/pad4                | 0.32481 | 0.34216 |
| dde2/ein2:dde2/pad4/sid2           | 0.5496  | 0.34631 |
| dde2/ein2:dde2/sid2                | 0.9773  | 0.5692  |
| dde2/ein2:ein2                     | 0.74577 | 0.00692 |
| dde2/ein2:ein2/pad4                | 0.51599 | 0.00266 |
| dde2/ein2:ein2/pad4/sid2           | 0.6225  | 0.00204 |
| dde2/ein2:ein2/sid2                | 0.4363  | 0.04455 |
| dde2/ein2:fls2                     | 0.37207 | 7.2E-18 |
| dde2/ein2:pad4                     | 0.50359 | 0.00746 |
| dde2/ein2:pad4/sid2                | 0.72288 | 0.34676 |
| dde2/ein2:sid2                     | 0.94177 | 0.20706 |
| dde2/ein2/pad4:dde2/ein2/pad4/sid2 | 0.92447 | 0.07902 |
| dde2/ein2/pad4:dde2/ein2/sid2      | 0.92515 | 0.61664 |
| dde2/ein2/pad4:dde2/pad4           | 0.4939  | 0.00332 |
| dde2/ein2/pad4:dde2/pad4/sid2      | 0.76605 | 0.00312 |
| dde2/ein2/pad4:dde2/sid2           | 0.78526 | 0.00093 |
| dde2/ein2/pad4:ein2                | 0.9814  | 4.1E-11 |
| dde2/ein2/pad4:ein2/pad4           | 0.72727 | 0.38703 |
| dde2/ein2/pad4:ein2/pad4/sid2      | 0.84817 | 0.40932 |
| dde2/ein2/pad4:ein2/sid2           | 0.63281 | 0.06129 |
| dde2/ein2/pad4:fls2                | 0.55385 | 1.2E-06 |
| dde2/ein2/pad4:pad4                | 0.71281 | 5E-11   |
| dde2/ein2/pad4:pad4/sid2           | 0.95716 | 0.0032  |
| dde2/ein2/pad4:sid2                | 0.81975 | 2.3E-07 |
| dde2/ein2/pad4/sid2:dde2/ein2/sid2 | 0.83377 | 0.01795 |
| dde2/ein2/pad4/sid2:dde2/pad4      | 0.35114 | 1.1E-07 |
| dde2/ein2/pad4/sid2:dde2/pad4/sid2 | 0.64611 | 7.4E-08 |

|                                    |         |         |
|------------------------------------|---------|---------|
| dde2/ein2/pad4/sid2:dde2/sid2      | 0.81118 | 9.2E-09 |
| dde2/ein2/pad4/sid2:ein2           | 0.90183 | 2.3E-22 |
| dde2/ein2/pad4/sid2:ein2/pad4      | 0.60175 | 0.00514 |
| dde2/ein2/pad4/sid2:ein2/pad4/sid2 | 0.74196 | 0.00555 |
| dde2/ein2/pad4/sid2:ein2/sid2      | 0.49661 | 6.1E-05 |
| dde2/ein2/pad4/sid2:fls2           | 0.41241 | 2.8E-05 |
| dde2/ein2/pad4/sid2:pad4           | 0.58538 | 3.3E-22 |
| dde2/ein2/pad4/sid2:pad4/sid2      | 0.87242 | 1.1E-07 |
| dde2/ein2/pad4/sid2:sid2           | 0.85379 | 9.7E-16 |
| dde2/ein2/sid2:dde2/pad4           | 0.55504 | 0.01434 |
| dde2/ein2/sid2:dde2/pad4/sid2      | 0.83867 | 0.01335 |
| dde2/ein2/sid2:dde2/sid2           | 0.71406 | 0.00474 |
| dde2/ein2/sid2:ein2                | 0.94368 | 9.2E-10 |
| dde2/ein2/sid2:ein2/pad4           | 0.79886 | 0.70966 |
| dde2/ein2/sid2:ein2/pad4/sid2      | 0.92233 | 0.74512 |
| dde2/ein2/sid2:ein2/sid2           | 0.70109 | 0.16709 |
| dde2/ein2/sid2:fls2                | 0.61841 | 8.7E-08 |
| dde2/ein2/sid2:pad4                | 0.78397 | 1.1E-09 |
| dde2/ein2/sid2:pad4/sid2           | 0.9679  | 0.01388 |
| dde2/ein2/sid2:sid2                | 0.74759 | 2.7E-06 |
| dde2/pad4:dde2/pad4/sid2           | 0.69896 | 0.9876  |
| dde2/pad4:dde2/sid2                | 0.33896 | 0.70608 |
| dde2/pad4:ein2                     | 0.50873 | 0.00025 |
| dde2/pad4:ein2/pad4                | 0.73724 | 0.03869 |
| dde2/pad4:ein2/pad4/sid2           | 0.62216 | 0.03303 |
| dde2/pad4:ein2/sid2                | 0.83642 | 0.28898 |
| dde2/pad4:fls2                     | 0.92656 | 1.3E-14 |
| dde2/pad4:pad4                     | 0.75186 | 0.00028 |
| dde2/pad4:pad4/sid2                | 0.5284  | 0.99059 |
| dde2/pad4:sid2                     | 0.36192 | 0.02637 |
| dde2/pad4/sid2:dde2/sid2           | 0.56873 | 0.71461 |
| dde2/pad4/sid2:ein2                | 0.7839  | 0.00024 |
| dde2/pad4/sid2:ein2/pad4           | 0.95915 | 0.03636 |
| dde2/pad4/sid2:ein2/pad4/sid2      | 0.9155  | 0.03093 |
| dde2/pad4/sid2:ein2/sid2           | 0.85694 | 0.2797  |
| dde2/pad4/sid2:fls2                | 0.76833 | 7.4E-15 |
| dde2/pad4/sid2:pad4                | 0.94375 | 0.00027 |
| dde2/pad4/sid2:pad4/sid2           | 0.80736 | 0.99708 |
| dde2/pad4/sid2:sid2                | 0.59934 | 0.02623 |
| dde2/sid2:ein2                     | 0.7674  | 0.00106 |
| dde2/sid2:ein2/pad4                | 0.53453 | 0.01517 |
| dde2/sid2:ein2/pad4/sid2           | 0.64274 | 0.0121  |
| dde2/sid2:ein2/sid2                | 0.45323 | 0.15307 |
| dde2/sid2:fls2                     | 0.38748 | 7.7E-16 |
| dde2/sid2:pad4                     | 0.52189 | 0.00116 |
| dde2/sid2:pad4/sid2                | 0.74429 | 0.71482 |
| dde2/sid2:sid2                     | 0.96442 | 0.06618 |
| ein2:ein2/pad4                     | 0.74484 | 1.1E-08 |
| ein2:ein2/pad4/sid2                | 0.86647 | 6E-09   |
| ein2:ein2/sid2                     | 0.64949 | 2.5E-06 |
| ein2:fls2                          | 0.56955 | 2.7E-29 |
| ein2:pad4                          | 0.73026 | 0.98047 |
| ein2:pad4/sid2                     | 0.97575 | 0.00027 |
| ein2:sid2                          | 0.80167 | 0.14445 |
| ein2/pad4:ein2/pad4/sid2           | 0.87499 | 0.9597  |
| ein2/pad4:ein2/sid2                | 0.89731 | 0.31472 |
| ein2/pad4:fls2                     | 0.80773 | 1.4E-08 |
| ein2/pad4:pad4                     | 0.98457 | 1.3E-08 |
| ein2/pad4:pad4/sid2                | 0.76795 | 0.03816 |
| ein2/pad4:sid2                     | 0.56425 | 1.8E-05 |
| ein2/pad4/sid2:ein2/sid2           | 0.77459 | 0.28801 |
| ein2/pad4/sid2:fls2                | 0.68868 | 1.3E-08 |
| ein2/pad4/sid2:pad4                | 0.85977 | 7.1E-09 |

|                          |         |         |
|--------------------------|---------|---------|
| ein2/pad4/sid2:pad4/sid2 | 0.89045 | 0.03207 |
| ein2/pad4/sid2:sid2      | 0.67501 | 1.2E-05 |
| ein2/sid2:fls2           | 0.909   | 2.8E-11 |
| ein2/sid2:pad4           | 0.91263 | 2.8E-06 |
| ein2/sid2:pad4/sid2      | 0.67151 | 0.28505 |
| ein2/sid2:sid2           | 0.48051 | 0.00104 |
| fls2:pad4                | 0.82274 | 2.6E-29 |
| fls2:pad4/sid2           | 0.59035 | 1.2E-14 |
| fls2:sid2                | 0.41241 | 4.1E-23 |
| pad4:pad4/sid2           | 0.75323 | 0.00029 |
| pad4:sid2                | 0.55127 | 0.15538 |
| pad4/sid2:sid2           | 0.77827 | 0.02718 |
